# Supplementary material
Source: MDPI journal article supplement (https://www.mdpi.com/2504-477X/5/6/142)
Supplement: s1 [file s1]

## Supplementary Data

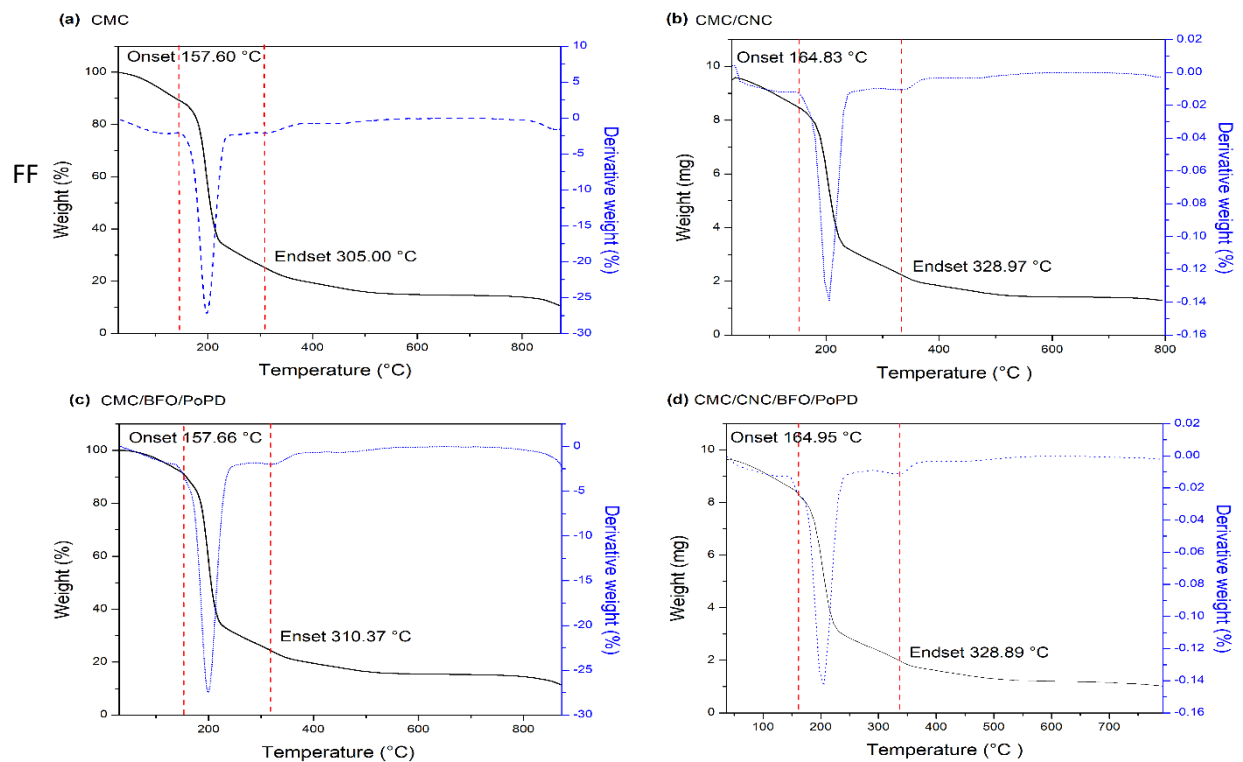

Figure S1 Thermogravimetric analysis of (a) CMC , (b) CMC/CNC<sup>MCC</sup>, (c) CMC/BFO/PoPD and (d) CMC/CNC<sup>MCC</sup>/BFO/PoPD composite film

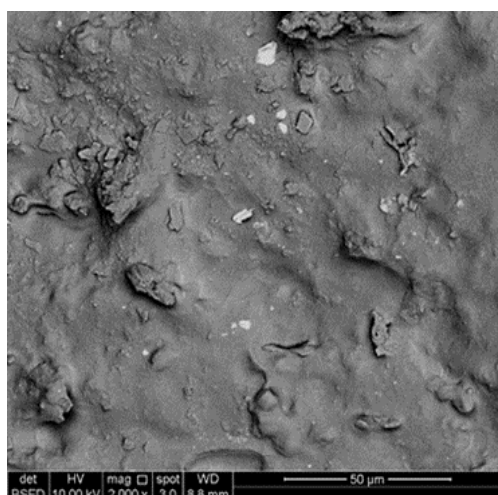

| Element | Weight% | Atomic% |
|---------|---------|---------|
| C       | 38.32   | 48.26   |
| N       | 2.97    | 3.20    |
| O       | 48.52   | 45.87   |
| Na      | 2.90    | 1.91    |
| Fe      | 1.18    | 0.32    |
| Bi      | 6.11    | 0.44    |
| Totals  | 100.00  |         |

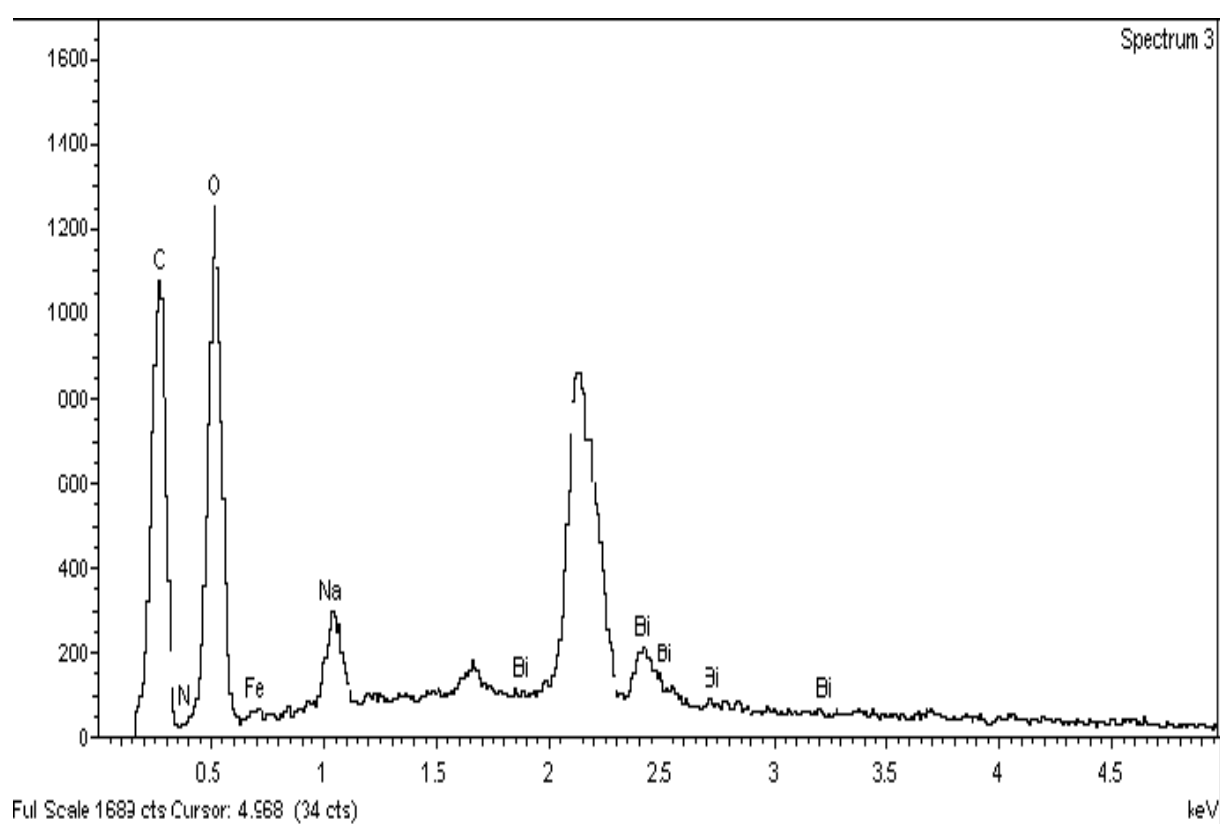

Figure S2: The SEM-EDX of CMC/CNC<sup>MCC</sup>/BFO/PoPD nanocomposite film.
